# Supplementary material for: PD-L1 and HLA Class I Antigen Expression and Clinical Course of the Disease in Intrahepatic Cholangiocarcinoma
Source: Oxford University Press journal article supplement (doi:10.1158/1078-0432.ccr-15-0715), 2015-09-15
Supplement: 10780432ccr150715-sup-147112_2_supp_0_ntsmp6.docx [file 10780432ccr150715-sup-147112_2_supp_0_ntsmp6.docx]

**Figure S1. (Online only)** Representative staining patterns of formalin-fixed, paraffin-embedded primary ICC lesions with nitrotyrosine-specific mAb. The staining with nitrotyrosine-specific mAb was scored as negative (**A**), heterogeneous (**B**) and positive (**C**). Representative negative (**D**) and positive (**E**) staining of FS of ICC lesions with nitrotyrosine-specific mAb are shown. Spleen tissue section (**F**) was used as a negative control. Magnification is indicated.

**Figure S2.** **(Online only)** Representative staining patterns of formalin-fixed, paraffin-embedded primary ICC lesions with HLA-DR, DQ and DP β chain-specific mAb LGII-612.14. The staining with HLA-DR, DQ and DP β chain-specific mAb LGII-612.14 was scored as negative (**A**), heterogeneous (**B**) and positive (**C**). Representative staining patterns of FS of ICC lesions with HLA-DR, DQ and DP β chain-specific mAb LGII-612.14 are shown (**D, E**). Liver tissue section was used as a negative control (**F**). Magnification is indicated.

**Figure S3. (Online only)** Representative staining patterns of formalin-fixed, paraffin-embedded primary ICC lesions with APM component-specific mAbs. Sections were stained with TAP2-specific mAb NOB2 and scored as positive (**A**), heterogeneous (**B**) and negative (**C**). Sections were stained with calreticulin-specific mAb TO-11 and scored as positive (**D**), heterogeneous (**E**) and negative (**F**). Sections were stained with calnexin-specific mAb TO-5 and scored as positive (**G**), heterogeneous (**H**) and negative (**I**). Magnification is indicated.
