# Supplementary material for: PD-L1 and HLA Class I Antigen Expression and Clinical Course of the Disease in Intrahepatic Cholangiocarcinoma
Source: Oxford University Press journal article supplement (doi:10.1158/1078-0432.ccr-15-0715), 2015-09-15
Supplement: 10780432ccr150715-sup-147112_2_supp_3074817_ns3xxn.docx [file 10780432ccr150715-sup-147112_2_supp_3074817_ns3xxn.docx]

**Table S1.**

|  | **HLA class I** | **PD-L1** |
| --- | --- | --- |
| **Gender** | *P* = 0.700 | *P* = 0.546 |
| **Age** | *P* = 0.261 | *P* = 0.658 |
| **AJCC stage** | ***P* = 0.029** | *P* = 0.465 |
| **T status** | *P* = 0.407 | *P* = 0.661 |
| **N status** | *P* = 0.286 | *P* = 0.571 |
| **Vascular invasion** | *P* = 0.782 | *P* = 0.279 |
| **Single vs. multiple lesions** | P = 0.286 | P = 0.571 |
| **Grading** | *P* = 1.000 | *P* = 0.332 |
| **Resection margins** | *P* = 0.586 | *P* = 0.610 |
